# Supplementary material for: Intragenic tandem repeat variation between Legionella pneumophila strains
Source: PubMed Central journal article supplement (PMC2639597; doi:10.1186/1471-2180-8-218), 2008-12-10
Supplement: 1471-2180-8-218-S1.pdf [file 1471-2180-8-218-S1.pdf]

**Additional file 1:****Repeat region PCR Primers used in this study**

| Gene     | Direction | Sequence (5' to 3')        | Expected fragment size (Philadelphia) |
|----------|-----------|----------------------------|---------------------------------------|
| LPG0451  | F         | GTTGCAGATTGCAGCGTAGA       | 721bp                                 |
| LPG0451  | R         | GAGTAGCGCCAGGAATTGAG       |                                       |
| LPG0451B | F         | CGCGTCTGCGATTAGAAAA        | 297bp                                 |
| LPG0451B | R         | TCCACATCACAACCAGCATT       |                                       |
| LPG0688  | F         | TATTCTTGATCCAACC           | 175bp                                 |
| LPG0688  | R         | TTACATCATTCCGCC            |                                       |
| LPG1035  | F         | TGATGTCTATGAATGG           | 654bp                                 |
| LPG1035  | R         | CTTTTGCCGAATCAGG           |                                       |
| LPG1038  | F         | ACCGTGATGCCAGTTTTGTT       | 100bp                                 |
| LPG1038  | R         | TGGACATAGATGGCATTGGA       |                                       |
| LPG1062  | F         | CCGCAATTATTATTGGTGTGG      | 1019bp                                |
| LPG1062  | R         | GAAAGAGGAACCGCCTCAC        |                                       |
| LPG1172  | F         | TTATCAGCGCTGGATGTTG        | 962bp                                 |
| LPG1172  | R         | CCAAGTTATTTGGGCTTCG        |                                       |
| LPG1172B | F         | AGATCAAGGATTTGCCGAAG       | 488bp                                 |
| LPG1172B | R         | ATTTCCACAATTTATTTTATTCCA   |                                       |
| LPG1299  | F         | AATCGAAAAAGCTGATGCAGT      | 186bp                                 |
| LPG1299  | R         | TCCATAACGGGCTCAAACAT       |                                       |
| LPG1356  | F         | TGAAAATGGCGACTACACCA       | 595bp                                 |
| LPG1356  | R         | ATTGGCTGCTTGTGAAAACC       |                                       |
| LPG1356B | F         | TGGACATGTCAACGCACAA        | 300bp                                 |
| LPG1356B | R         | GCGTAAGCTTTAACCAAGCTC      |                                       |
| LPG1421  | F         | ATTCCTGGAAGCGAGTCAA        | 845bp                                 |
| LPG1421  | R         | TTTGCTTCAACTTCATCACCA      |                                       |
| LPG1555  | F         | ATGGCATCTGAACCCTATGC       | 108bp                                 |
| LPG1555  | R         | TTGATCAGGTTTGCCATAA        |                                       |
| LPG1602  | F         | GCGCGTTGAACTATTTAATCC      | 988bp                                 |
| LPG1602  | R         | CGATAATTTAATCGTCGCTATATTGG |                                       |
| LPG1948  | F         | CAAACAAAAGAAATAATCGCTGAA   | 682bp                                 |
| LPG1948  | R         | TGGTTAATTTACCTTCGATTTGC    |                                       |
| LPG1958  | F         | CTGTTTCAAATAGGAGAGCACAA    | 1200bp                                |
| LPG1958  | R         | GCCCATGTTCAAGCTGGTTA       |                                       |
| LPG1976  | F         | AATATAATCGGCCGCAAATC       | 661bp                                 |
| LPG1976  | R         | TTGTTGATTGCGCTCTTGTC       |                                       |
| LPG2222  | F         | CACCAGAGGGCTATAAAAAGG      | 692bp                                 |
| LPG2222  | R         | GGCTGCTGTAAACCAAGCAT       |                                       |
| LPG2224  | F         | ACATCACTTCCATCG            | 1164bp                                |
| LPG2224  | R         | ATGATGCAATGATTGC           |                                       |
| LPG2392  | F         | TGGGAGATTTTCACCATGTTT      | 538bp                                 |

|         |   |                       |        |
|---------|---|-----------------------|--------|
| LPG2392 | R | AAGGAGTGCCAGCTTTTCAA  |        |
| LPG2416 | F | GTCTGGCCGCAGAGAATG    | 292bp  |
| LPG2416 | R | ATTTCTGCGTAAGCGAGCAT  |        |
| LPG2485 | F | GCCATTTACCTCAAGCCATT  | 995bp  |
| LPG2485 | R | CATATGCCTGCTGATCACATC |        |
| LPG2559 | F | AATCGAACAATGGGGAAGTG  | 248bp  |
| LPG2559 | R | CCCCATTTTGCAGTACTTGG  |        |
| LPG2639 | F | AACATTGGTATACTGC      | 840bp  |
| LPG2639 | R | CATAACTTACTTTACC      |        |
| LPG2644 | F | TCACATCACAGATAGC      | 1299bp |
| LPG2644 | R | TTCCCAGCTCATTACG      |        |
| LPG2793 | F | ATGAAAGATCATGCAC      | 1092bp |
| LPG2793 | R | ATCTTCTTCAGATGAG      |        |
